# Supplementary material for: An Exploration of Formal and Informal Mindfulness Practice and Associations with Wellbeing
Source: Springer Nature journal article supplement (doi:10.1007/s12671-018-0951-y), 2018-05-21
Supplement: MOESM1 [file 15780242]

## How do people practice mindfulness: survey questions

### Current formal mindfulness practice:

Do you currently practice formal mindfulness? (e.g. body scan, sitting practice, breathing space, mindful movement) Yes / No

Comments: \_\_\_\_\_

#### If 'No' is selected:

1. Why are you no longer practicing? Select all that apply:

Lack of time

Hadn't formed a habit

Got out of the habit

I didn't find it helpful

I decided it wasn't for me

Other stressors

I felt worse during or after practice

Loss of teacher support

Loss of support of the group setting

Other: \_\_\_\_\_

2. Is there anything you can think of that would have supported you to continue with formal mindfulness practice? \_\_\_\_\_

#### If 'Yes' is selected:

1. How often do you practice? Every day / several times a week / once or twice a week / around once a week / less than once a week

2. How long **on average** does your practice session last? 1 hour / 45 minutes / 30 minutes / 10 minutes

Comments: \_\_\_\_\_

3. How is your practice supported (select all that apply): CD / app / self-guided / guided by others / practice in a group with guidance / practice in a group without guidance

Comments: \_\_\_\_\_

4. If you aren't practicing as regularly as you used to, or as you would like, is there anything you can think of that would support you to practice more regularly?

\_\_\_\_\_

5. Which practices do you do most regularly?

body scan

sitting practice

breathing space

mindful movement

all of the above

other

Comments: \_\_\_\_\_

6. How would you describe your experience of these practices? We understand that your experience of practice may change from day to day so please select **all** that apply:

Easy

difficult

enjoyable

boring

practice reluctantly

interesting

irritating

relaxing

it is what it is

blissful

practice willingly

ok

Comments: \_\_\_\_\_

7. Are there any practices you dislike or find difficult, and so do not do? Yes / No

8. If yes, which practices? \_\_\_\_\_

### Informal mindfulness:

**1.** Do you engage in everyday mindful moments? For example being mindful while washing the dishes, while driving, or eating. Yes / No

**2.** If yes, how often? Every day / several times a week / once or twice a week / around once a week

Comments: \_\_\_\_\_
