# Supplementary material for: An Exploration of Formal and Informal Mindfulness Practice and Associations with Wellbeing
Source: Springer Nature journal article supplement (doi:10.1007/s12671-018-0951-y), 2018-05-21
Supplement: MOESM2 [file 15780242]

## How do people practice mindfulness: sleep data, current practice

Group 1: attended a face-to-face taught course (N=115)

Group 2: followed a course from a book or online (N=30)

Group 3: did not attend or follow a structured course (N=73)

Of the 198 participants currently practicing formal mindfulness 112 (56.6%) reported falling asleep during practice:

Group 1: 63

Group 2: 20

Group 3: 29

### Do you fall asleep regularly? No:

Group 1: 39

Group 2: 10

Group 3: 21

### Which practices do you fall asleep during?

Body scan:

Group 1: 43

Group 2: 12

Group 3: 12

Breathing/sitting practice:

Group 1: 10

Group 2: 3

Group 3: 10

### How do you feel about falling asleep?

|                                                  | Grp 1 | Grp 2 | Grp 3 |
|--------------------------------------------------|-------|-------|-------|
| Intended to/find it helpful for getting to sleep | 2     | 1     | 3     |
| Positive response                                | 1     | 1     | 3     |
| Accepting response                               | 39    | 12    | 19    |
| Negative response                                | 13    | 1     | 3     |
| Combination of acceptance and negative response  | 5     | 1     | 1     |
